# Supplementary material for: sraX: A Novel Comprehensive Resistome Analysis Tool
Source: Front Microbiol. 2020 Feb 5;11:52. doi: 10.3389/fmicb.2020.00052 (PMC7025521; doi:10.3389/fmicb.2020.00052)
Supplement: Supplementary file 1 [file Table_1.XLSX]

## Sheet: In_silico_detected_ARGs_&_SNPs
Table S1: Analyzed genomes, phenotyping data and in silico genotyping ARGs.																					Sequence quality		Aminoglycoside											Bacitracin	Daptomycin	Lincosamide					Macrolide
Strain	Assembly	WGS	Genus	Species	State	Source	BioSample Accession	GEN	KAN	PEN	CIP	DAP	ERY	TYL	NIT	CHL	QDA	TET	LZD	VAN	Coverage	N50	aac(6')-aph(2'')	aac(6')-aph(2'')	aph(2'')-Id	aph(2'')-Id	aph(3')-III	aph(3')-III	aadD	aadD	aac(6’)-li	spc	spc	bacA	liaS (point mutation)	lnu(A)	lnu(A)	lnu(B)	lnu(B)	eatAv (point mutation)	erm(A)	erm(A)	erm(B)	erm(B)	mph(B)	mph(B)	mph(D)	msr(C)	msr(C)
CVM N52454	GCA_002947155.1	PUBU00000000	Enterococcus	faecalis	GA	Chicken Breast	SAMN07981901	S	R	S	S	S	R	R	S	R	S	R	S	S	54.74	48907					aph(3')-III	aph(3')-III			aac(6’)-li			bacA		lnu(A)	lnu(A)						erm(B)	erm(B)			mph(D)
CVM N52459	GCA_002947115.1	PUBT00000000	Enterococcus	faecium	GA	Ground Turkey	SAMN07981902	S	S	R	S	S	S	S	S	S	R	R	S	S	96.98	28722																lnu(B)	lnu(B)
CVM N52467	GCA_002947085.1	PUBS00000000	Enterococcus	faecalis	GA	Ground Beef	SAMN07981903	S	S	S	S	S	S	S	S	S	S	S	S	S	72.45	46598									aac(6’)-li			bacA
CVM N52469	GCA_002947075.1	PUBR00000000	Enterococcus	faecalis	GA	Ground Beef	SAMN07981904	S	S	S	S	S	S	S	S	S	S	S	S	S	28.56	34644									aac(6’)-li			bacA													mph(D)
CVM N52564	GCA_002947055.1	PUBQ00000000	Enterococcus	faecalis	MD	Chicken Wing	SAMN07981905	S	R	S	S	S	R	R	S	R	S	R	S	S	52.25	44400					aph(3')-III	aph(3')-III			aac(6’)-li			bacA									erm(B)	erm(B)			mph(D)
CVM N52587	GCA_002947015.1	PUBP00000000	Enterococcus	faecalis	MD	Ground Beef	SAMN07981906	S	S	S	S	S	S	S	S	S	S	S	S	S	39.7	41944									aac(6’)-li			bacA
CVM N52623	GCA_002946975.1	PUBO00000000	Enterococcus	faecalis	OR	Ground Beef	SAMN07981907	S	S	S	S	S	S	S	S	S	S	S	S	S	38.82	54283									aac(6’)-li			bacA													mph(D)
CVM N52629	GCA_002946955.1	PUBM00000000	Enterococcus	faecium	OR	Pork Chop	SAMN07981908	S	S	S	S	S	S	S	S	S	S	S	S	S	62.44	31740																										msr(C)	msr(C)
CVM N52636	GCA_002946985.1	PUBN00000000	Enterococcus	faecium	OR	Chicken Breast	SAMN07981909	S	S	S	S	R	S	S	S	S	S	S	S	S	46.45	55341																										msr(C)	msr(C)
CVM N52643	GCA_002946915.1	PUBL00000000	Enterococcus	faecium	OR	Ground Turkey	SAMN07981910	S	S	R	S	S	R*	S	S	S	R	R	S	S	95.32	28902																lnu(B)	lnu(B)									msr(C)	msr(C)
CVM N52648	GCA_002946875.1	PUBK00000000	Enterococcus	faecalis	OR	Ground Turkey	SAMN07981911	R	R	S	S	S	R	R	S	S	S	R	S	S	75.71	51938	aac(6')-aph(2'')	aac(6')-aph(2'')			aph(3')-III	aph(3')-III			aac(6’)-li			bacA									erm(B)	erm(B)			mph(D)
CVM N52649	GCA_002946895.1	PUBJ00000000	Enterococcus	faecium	OR	Ground Turkey	SAMN07981912	S	S	S	S	R	S	S	S	S	S	S	S	S	40.95	35265																										msr(C)	msr(C)
CVM N52656	GCA_002946855.1	PUBI00000000	Enterococcus	faecium	OR	Ground Beef	SAMN07981913	S	S	S	S	S	S	S	R	S	S	S	S	S	97.42	74777																										msr(C)	msr(C)
CVM N52662	GCA_002946755.1	PUBH00000000	Enterococcus	faecalis	OR	Pork Chop	SAMN07981914	S	S	S	S	R	S	S	S	S	S	S*	S	S	111.04	82557									aac(6’)-li			bacA
CVM N52690	GCA_002946765.1	PUBG00000000	Enterococcus	faecium	OR	Ground Beef	SAMN07981915	S	S	S	S	S	S	S	S	S	S	S	S	S	70.12	55592																										msr(C)	msr(C)
CVM N52702	GCA_002946805.1	PUBF00000000	Enterococcus	faecium	TN	Chicken Breast	SAMN07981916	S	S	S	S	S	S	S	S	S	S	S	S	S	70.92	20629																										msr(C)	msr(C)
CVM N52724	GCA_002946795.1	PUBE00000000	Enterococcus	faecalis	TN	Ground Beef	SAMN07981917	S	S	S	S	S	S	S	S	S	S	S	S	S	46.2	54222									aac(6’)-li			bacA													mph(D)
CVM N52729	GCA_002948775.1	PTXY00000000	Enterococcus	faecalis	TN	Pork Chop	SAMN07981918	S	S	S	S	S	S	S	S	S	S	S	S	S	44.92	65309									aac(6’)-li			bacA													mph(D)
CVM N52732	GCA_002948755.1	PTXZ00000000	Enterococcus	faecium	TN	Pork Chop	SAMN07981919	S	S	S	S	S	R	R	S	S	S	R	S	S	30.01	25649																					erm(B)	erm(B)				msr(C)	msr(C)
CVM N52734	GCA_002948735.1	PTYA00000000	Enterococcus	faecalis	TN	Pork Chop	SAMN07981920	S	R	S	S	S	R	R	S	R	S	R	S	S	42.07	53718					aph(3')-III	aph(3')-III			aac(6’)-li			bacA									erm(B)	erm(B)			mph(D)
CVM N52751	GCA_002948705.1	PTYB00000000	Enterococcus	faecium	TN	Ground Turkey	SAMN07981921	S	S	R	S	S	R*	S	R	S	S	S	S	S	129	49239																										msr(C)	msr(C)
CVM N52755	GCA_002949275.1	PTYC00000000	Enterococcus	faecalis	TN	Ground Turkey	SAMN07981922	S	S	S	S	S	S	S	S	S	S	S	S	S	44.81	51490									aac(6’)-li			bacA													mph(D)
CVM N52769	GCA_002948695.1	PTYD00000000	Enterococcus	faecium	TN	Pork Chop	SAMN07981923	S	S	S	S	S	S	S	S	S	S	S	S	S	88.96	24859																										msr(C)	msr(C)
CVM N52773	GCA_002949225.1	PTYE00000000	Enterococcus	faecalis	TN	Chicken Wing	SAMN07981924	S	S	S	S	S	S	S	S	S	S	S	S	S	31.31	34919									aac(6’)-li			bacA													mph(D)
CVM N52777	GCA_002948675.1	PTYF00000000	Enterococcus	faecium	TN	Chicken Breast	SAMN07981925	R	R	S	S	S	S	S	R	S	S	R	S	S	61.94	40647	aac(6')-aph(2'')	aac(6')-aph(2'')														lnu(B)	lnu(B)									msr(C)	msr(C)
CVM N52789	GCA_002948635.1	PTYG00000000	Enterococcus	faecalis	TN	Ground Turkey	SAMN07981926	R	R	S	S	S	R	R	S	S	S	R	S	S	27.59	18858	aac(6')-aph(2'')				aph(3')-III	aph(3')-III			aac(6’)-li												erm(B)	erm(B)			mph(D)
CVM N52824	GCA_002948595.1	PTYH00000000	Enterococcus	faecium	TN	Ground Turkey	SAMN07981927	S	R	R	S	R	R	R	R	S	R	R	S	S	68.31	22120					aph(3')-III	aph(3')-III										lnu(B)	lnu(B)				erm(B)	erm(B)
CVM N52829	GCA_002948605.1	PTYI00000000	Enterococcus	faecium	TN	Ground Turkey	SAMN07981928	R	R	R	S	S	R	R	R	S	S*	R	S	S	133.6	33534			aph(2'')-Id	aph(2'')-Id	aph(3')-III	aph(3')-III										lnu(B)	lnu(B)				erm(B)	erm(B)				msr(C)	msr(C)
CVM N53405	GCA_002948555.1	PTYJ00000000	Enterococcus	faecalis	GA	Ground Turkey	SAMN07981929	R	R	S	S	S	S	S	S	S	S	R	S	S	32.6	38664	aac(6')-aph(2'')	aac(6')-aph(2'')							aac(6’)-li			bacA													mph(D)
CVM N53418	GCA_002948535.1	PTYK00000000	Enterococcus	faecalis	GA	Pork Chop	SAMN07981930	R	R	S	S	S	R	R	S	R	S	R	S	S	58.06	43513	aac(6')-aph(2'')	aac(6')-aph(2'')			aph(3')-III	aph(3')-III			aac(6’)-li			bacA									erm(B)	erm(B)			mph(D)
CVM N53420	GCA_002948515.1	PTYL00000000	Enterococcus	faecalis	GA	Pork Chop	SAMN07981931	S	S	S	S	S	S	S	S	S	S	R	S	S	66.89	37813									aac(6’)-li			bacA
CVM N53434	GCA_002948495.1	PTYM00000000	Enterococcus	faecalis	GA	Chicken Wing	SAMN07981932	S	S	S	S	S	R	R	S	R	S	R	S	S	47.07	68594									aac(6’)-li			bacA									erm(B)	erm(B)			mph(D)
CVM N53439	GCA_002949215.1	PTYN00000000	Enterococcus	faecium	GA	Ground Turkey	SAMN07981933	S	S	S	S	R	R	R	R	S	R	R	S	S	84.5	27137																lnu(B)	lnu(B)				erm(B)	erm(B)
CVM N53453	GCA_002948455.1	PTYO00000000	Enterococcus	faecalis	GA	Ground Beef	SAMN07981934	S	S	S	S	S	S	S	S	S	S	S	S	S	90.45	93186									aac(6’)-li			bacA													mph(D)
CVM N53457	GCA_002948435.1	PTYP00000000	Enterococcus	faecalis	GA	Pork Chop	SAMN07981935	S	R	S	S	S	R	R	S	R	S	R	S	S	92.01	65818					aph(3')-III	aph(3')-III			aac(6’)-li			bacA				lnu(B)	lnu(B)				erm(B)	erm(B)			mph(D)
CVM N53476	GCA_002949195.1	PTYQ00000000	Enterococcus	faecalis	GA	Ground Turkey	SAMN07981936	S	S	S	S	S	S	S	S	S	S	S	S	S	80.69	77484									aac(6’)-li			bacA													mph(D)
CVM N53479	GCA_002948415.1	PTYR00000000	Enterococcus	faecium	GA	Ground Turkey	SAMN07981937	R	R	R	S	S	S	S	R	S	S	R	S	S	59.48	31843	aac(6')-aph(2'')	aac(6')-aph(2'')																T450I								msr(C)	msr(C)
CVM N53519	GCA_002949155.1	PTYS00000000	Enterococcus	faecalis	MD	Ground Turkey	SAMN07981938	R	R	S	S	S	R	R	S	S	S	R	S	S	82.84	71669	aac(6')-aph(2'')	aac(6')-aph(2'')			aph(3')-III	aph(3')-III			aac(6’)-li			bacA									erm(B)	erm(B)			mph(D)
CVM N53533	GCA_002949135.1	PTYT00000000	Enterococcus	faecium	MD	Ground Beef	SAMN07981939	S	S	S	S	S	S	S	S	S	S	R	S	S	65.29	59110																		T450I								msr(C)	msr(C)
CVM N53548	GCA_002948395.1	PTYU00000000	Enterococcus	faecium	MD	Chicken Breast	SAMN07981940	S	S	S	S	S	S	S	S	S	R*	R	S	S	74.75	45954																										msr(C)	msr(C)
CVM N53559	GCA_002949115.1	PTYV00000000	Enterococcus	faecium	MD	Ground Turkey	SAMN07981941	S	S	R	S	S	R*	S	S	S	R	R	S	S	62.42	24517																										msr(C)	msr(C)
CVM N53595	GCA_002948375.1	PTYW00000000	Enterococcus	faecium	MD	Ground Turkey	SAMN07981942	R	R	R	S	S	R	R	R	S	R	R	S	S	50.12	20387	aac(6')-aph(2'')				aph(3')-III	aph(3')-III															erm(B)	erm(B)
CVM N53655	GCA_002948355.1	PTYX00000000	Enterococcus	faecium	OR	Chicken Breast	SAMN07981943	R	R	S	S	S	R	R	R	S	S	R	S	S	67.24	23926			aph(2'')-Id	aph(2'')-Id	aph(3')-III	aph(3')-III										lnu(B)	lnu(B)				erm(B)	erm(B)
CVM N53661	GCA_002948335.1	PTYY00000000	Enterococcus	faecalis	OR	Chicken Breast	SAMN07981944	R	R	S	S	S	R	R	S	S	S	R	S	S	87.21	58069	aac(6')-aph(2'')	aac(6')-aph(2'')			aph(3')-III	aph(3')-III			aac(6’)-li			bacA									erm(B)	erm(B)			mph(D)
CVM N53702	GCA_002949075.1	PTYZ00000000	Enterococcus	faecium	OR	Ground Turkey	SAMN07981945	S	S	R	S	R	S*	S*	S	S	R	R	S	S	56.97	27939										spc	spc					lnu(B)	lnu(B)		erm(A)	erm(A)						msr(C)	msr(C)
CVM N53761	GCA_002948275.1	PTZA00000000	Enterococcus	faecalis	TN	Chicken Wing	SAMN07981946	R	R	S	S	S	R	R	S	S	S	R	S	S	89.57	56918	aac(6')-aph(2'')	aac(6')-aph(2'')			aph(3')-III	aph(3')-III			aac(6’)-li												erm(B)	erm(B)
CVM N53766	GCA_002948315.1	PTZB00000000	Enterococcus	faecalis	TN	Ground Turkey	SAMN07981947	R	R	S	S	S	R	R	S	S	S	R	S	S	96.44	58940	aac(6')-aph(2'')	aac(6')-aph(2'')			aph(3')-III	aph(3')-III			aac(6’)-li												erm(B)	erm(B)			mph(D)
CVM N53804	GCA_002948245.1	PTZC00000000	Enterococcus	faecium	TN	Ground Turkey	SAMN07981948	R	S*	R	S	S	S	S	R	S	S	R	S	S	56.41	34530			aph(2'')-Id	aph(2'')-Id																						msr(C)	msr(C)
CVM N53805	GCA_002949055.1	PTZD00000000	Enterococcus	faecium	TN	Ground Turkey	SAMN07981949	R	R	S	S	S	R	R	R	S	R	R	S	S	67.66	23412	aac(6')-aph(2'')	aac(6')-aph(2'')			aph(3')-III	aph(3')-III										lnu(B)	lnu(B)				erm(B)	erm(B)				msr(C)	msr(C)
CVM N54035	GCA_002948235.1	PTZE00000000	Enterococcus	faecium	GA	Chicken Breast	SAMN07981950	S	S	S	S	S	S	S	S	S	S	S	S	S	53.78	40647																										msr(C)	msr(C)
CVM N54070	GCA_002949035.1	PTZF00000000	Enterococcus	faecium	MD	Chicken Breast	SAMN07981951	S	S	R	S	S	R	R	R	S	R	R	S	S	57.58	31060																lnu(B)	lnu(B)				erm(B)	erm(B)				msr(C)	msr(C)
CVM N54097	GCA_002949015.1	PTZG00000000	Enterococcus	faecalis	MD	Pork Chop	SAMN07981952	R	R	S	S	S	R	R	S	S*	S	R	S	S	75.83	80976	aac(6')-aph(2'')	aac(6')-aph(2'')			aph(3')-III	aph(3')-III			aac(6’)-li			bacA				lnu(B)	lnu(B)				erm(B)	erm(B)			mph(D)
CVM N54107	GCA_002948955.1	PTZH00000000	Enterococcus	faecium	MD	Chicken Breast	SAMN07981953	S	S	S	S	S	S	S	S	S	S	S	S	S	41.94	18128																										msr(C)	msr(C)
CVM N54118	GCA_002948195.1	PTZI00000000	Enterococcus	faecalis	MD	Ground Turkey	SAMN07981954	R	R	S	S	S	R	R	S	S	S	R	S	S	48.01	43364	aac(6')-aph(2'')	aac(6')-aph(2'')			aph(3')-III	aph(3')-III			aac(6’)-li			bacA									erm(B)				mph(D)
CVM N54121	GCA_002948975.1	PTZJ00000000	Enterococcus	faecalis	MD	Ground Turkey	SAMN07981955	R	R	S	S	S	R	R	S	S	S	R	S	S	61.32	43364	aac(6')-aph(2'')	aac(6')-aph(2'')			aph(3')-III	aph(3')-III			aac(6’)-li			bacA									erm(B)	erm(B)			mph(D)
CVM N54150	GCA_002948915.1	PTZK00000000	Enterococcus	faecium	MD	Chicken Breast	SAMN07981956	S	S	S	S	S	R	R	R	S	R	S*	S	S	55.54	47086																					erm(B)	erm(B)				msr(C)	msr(C)
CVM N54152	GCA_002948175.1	PTZL00000000	Enterococcus	faecium	MD	Chicken Breast	SAMN07981957	S	S	S	S	R	S	S	R	S	R	R	S	S	93.16	53145																										msr(C)	msr(C)
CVM N54155	GCA_002948115.1	PTZM00000000	Enterococcus	faecium	MD	Ground Turkey	SAMN07981958	S	R	R	S	R	R	R	R	S	R	R	S	S	81.28	23654					aph(3')-III	aph(3')-III															erm(B)	erm(B)
CVM N54156	GCA_002948095.1	PTZN00000000	Enterococcus	faecalis	MD	Ground Turkey	SAMN07981959	S	S	S	S	S	R	R	S	R	S	R	S	S	71.69	83534									aac(6’)-li			bacA									erm(B)	erm(B)			mph(D)
CVM N54190	GCA_002948155.1	PTZO00000000	Enterococcus	faecium	OR	Ground Turkey	SAMN07981960	S	R*	R	S	S	S	S	S	S	R	R	S	S	107.81	30199																lnu(B)	lnu(B)									msr(C)	msr(C)
CVM N54519	GCA_002948895.1	PTZP00000000	Enterococcus	faecium	GA	Ground Beef	SAMN07981961	S	S	S	S	S	S*	S*	S	S	S	S	S	S	101.5	56202																					erm(B)	erm(B)				msr(C)	msr(C)
CVM N54538	GCA_002948875.1	PTZQ00000000	Enterococcus	faecium	OR	Chicken Legs	SAMN07981962	R	R	R	S	S	R	R	R	S	S	S	S	S	84.71	31047			aph(2'')-Id	aph(2'')-Id	aph(3')-III	aph(3')-III										lnu(B)	lnu(B)				erm(B)	erm(B)
CVM N54546	GCA_002948075.1	PTZR00000000	Enterococcus	faecium	OR	Ground Turkey	SAMN07981963	S	S	S	S	R	S	S	R	S	S	R	S	S	78.63	29678																lnu(B)	lnu(B)									msr(C)	msr(C)
CVM N54548	GCA_002948035.1	PTZS00000000	Enterococcus	faecalis	OR	Ground Turkey	SAMN07981964	S	S	S	S	S	S	S	S	S	S	S	S	S	81.72	66244									aac(6’)-li			bacA
CVM N54550	GCA_002948015.1	PTZT00000000	Enterococcus	faecium	OR	Ground Turkey	SAMN07981965	R	R	R	S	S	R	R	R	S	S	R	S	S	100.72	29159			aph(2'')-Id	aph(2'')-Id	aph(3')-III	aph(3')-III										lnu(B)	lnu(B)				erm(B)	erm(B)
CVM N54551	GCA_002948045.1	PTZU00000000	Enterococcus	faecium	OR	Ground Turkey	SAMN07981966	S	R	R	S	S	S	S	R	S	R	R	S	S	83.36	25556					aph(3')-III	aph(3')-III										lnu(B)	lnu(B)									msr(C)	msr(C)
CVM N54553	GCA_002947985.1	PTZV00000000	Enterococcus	faecalis	OR	Ground Turkey	SAMN07981967	S	S	S	S	S	S	S	S	S	S	R	S	S	88.87	73149									aac(6’)-li			bacA													mph(D)
CVM N54560	GCA_002947925.1	PTZW00000000	Enterococcus	faecium	OR	Ground Beef	SAMN07981968	S	S	S	S	S	R*	S	R	R	S	R	S	S	81.11	40613																										msr(C)	msr(C)
CVM N54564	GCA_002947935.1	PTZX00000000	Enterococcus	faecalis	OR	Pork Chop	SAMN07981969	S	S	S	S	S	R	R	S	R	S	R	S	S	83.28	62088									aac(6’)-li			bacA									erm(B)	erm(B)			mph(D)
CVM N54567	GCA_002947885.1	PTZY00000000	Enterococcus	faecium	MD	Chicken Breast	SAMN07981970	S	S	R	S	S	S	S	R	S	R*	R	S	S	86.33	24164
CVM N54574	GCA_002948855.1	PTZZ00000000	Enterococcus	faecalis	MD	Chicken Breast	SAMN07981971	S	S	S	S	S	S	S	S	S	S	S	S	S	78.94	57883									aac(6’)-li			bacA													mph(D)
CVM N54576	GCA_002947875.1	PUAA00000000	Enterococcus	faecalis	MD	Ground Turkey	SAMN07981972	R	R	S	S	S	R	R	S	S	S	R	S	S	51.99	43238	aac(6')-aph(2'')	aac(6')-aph(2'')			aph(3')-III	aph(3')-III			aac(6’)-li			bacA									erm(B)	erm(B)			mph(D)
CVM N54588	GCA_002947835.1	PUAB00000000	Enterococcus	faecalis	MD	Ground Beef	SAMN07981973	S	S	S	S	S	S	S	S	S	S	S	S	S	93.96	70173									aac(6’)-li			bacA													mph(D)
CVM N54595	GCA_002947815.1	PUAC00000000	Enterococcus	faecalis	MD	Pork Chop	SAMN07981974	S	S	S	S	S	S	S	S	S	S	S	S	S	46.89	44700									aac(6’)-li			bacA													mph(D)
CVM N54599	GCA_002947775.1	PUAD00000000	Enterococcus	faecium	TN	Chicken Breast	SAMN07981975	S	S	S	S	S	S	S	S	S	R	R	S	S	76.51	54250																lnu(B)	lnu(B)									msr(C)	msr(C)
CVM N54671	GCA_002947765.1	PUAE00000000	Enterococcus	faecium	TN	Chicken Wing	SAMN07981976	S	S	R	S	R	S	S	R	S	R	R	S	S	96.94	25838
CVM N54676	GCA_002948815.1	PUAF00000000	Enterococcus	faecalis	TN	Ground Turkey	SAMN07981977	R	R	S	S	S	R	R	S	S	S	R	S	S	52.46	38142	aac(6')-aph(2'')	aac(6')-aph(2'')			aph(3')-III	aph(3')-III			aac(6’)-li			bacA									erm(B)	erm(B)			mph(D)
CVM N55072	GCA_002948795.1	PUAG00000000	Enterococcus	faecium	GA	Chicken Wings	SAMN07981978	S	S	S	S	S	R	R	R	R	S	R	S	S	75.29	57687																					erm(B)	erm(B)				msr(C)	msr(C)
CVM N55077	GCA_002947735.1	PUAH00000000	Enterococcus	faecium	GA	Chicken Wings	SAMN07981979	R	R	S	S	S	R	R	S	S	R*	S	S	S	83.15	54385			aph(2'')-Id	aph(2'')-Id												lnu(B)	lnu(B)				erm(B)	erm(B)				msr(C)	msr(C)
CVM N55106	GCA_002947715.1	PUAI00000000	Enterococcus	faecalis	GA	Pork Chop	SAMN07981980	R	R	S	S	S	R	R	S	R	S	R	S	S	68.39	58060	aac(6')-aph(2'')	aac(6')-aph(2'')			aph(3')-III	aph(3')-III			aac(6’)-li			bacA				lnu(B)	lnu(B)				erm(B)	erm(B)			mph(D)
CVM N55113	GCA_002947695.1	PUAJ00000000	Enterococcus	faecalis	GA	Chicken Wing	SAMN07981981	R	R	S	S	S	R	R	S	S	S	R	S	S	55.59	42152	aac(6')-aph(2'')	aac(6')-aph(2'')			aph(3')-III	aph(3')-III			aac(6’)-li			bacA									erm(B)	erm(B)
CVM N55119	GCA_002947635.1	PUAK00000000	Enterococcus	faecalis	GA	Chicken Wing	SAMN07981982	R	R	S	S	S	R	R	S	S	S	R	S	S	61.72	46353	aac(6')-aph(2'')	aac(6')-aph(2'')			aph(3')-III	aph(3')-III			aac(6’)-li			bacA									erm(B)	erm(B)			mph(D)
CVM N55181	GCA_002947595.1	PUAL00000000	Enterococcus	faecalis	GA	Pork Chop	SAMN07981983	R	R	S	S	S	R	R	S	S	S	R	S	S	67.07	54176	aac(6')-aph(2'')	aac(6')-aph(2'')			aph(3')-III				aac(6’)-li			bacA									erm(B)	erm(B)			mph(D)
CVM N55185	GCA_002947645.1	PUAM00000000	Enterococcus	faecalis	GA	Pork Chop	SAMN07981984	S	S	S	S	S	S	S	S	S	S	R	S	S	53.97	47325									aac(6’)-li			bacA													mph(D)
CVM N55229	GCA_002947615.1	PUAN00000000	Enterococcus	faecium	MD	Chicken Breast	SAMN07981985	R	R	S	S	S	R	R	R	S	R	R	S	S	72.34	37600			aph(2'')-Id	aph(2'')-Id												lnu(B)	lnu(B)				erm(B)	erm(B)				msr(C)	msr(C)
CVM N55240	GCA_002947555.1	PUAO00000000	Enterococcus	faecalis	MD	Ground Turkey	SAMN07981986	S	S	S	S	S	S	S	S	R	S	R	S	S	30.6	43359									aac(6’)-li			bacA													mph(D)
CVM N55265	GCA_002947435.1	PUAQ00000000	Enterococcus	faecalis	MD	Pork Chop	SAMN07981988	S	S	S	S	S	S	S	S	S	S	S	S	S	93.84	84917									aac(6’)-li			bacA
CVM N55268	GCA_002947395.1	PUAR00000000	Enterococcus	faecalis	OR	Chicken Breast	SAMN07981989	R	R	S	S	S	R	R	S	S	S	R	S	S	59.9	42693	aac(6')-aph(2'')	aac(6')-aph(2'')			aph(3')-III				aac(6’)-li			bacA									erm(B)	erm(B)
CVM N55279	GCA_002947365.1	PUAS00000000	Enterococcus	faecium	OR	Ground Turkey	SAMN07981990	R*	R*	S	S	S	R*	R*	S	S	S	S*	S	S	85.95	78689																										msr(C)	msr(C)
CVM N55290	GCA_002947355.1	PUAT00000000	Enterococcus	faecium	OR	Ground Beef	SAMN07981991	S	S	S	S	S	S	S	S	S	S	S	S	S	70.71	28023																										msr(C)	msr(C)
CVM N55299	GCA_002947335.1	PUAU00000000	Enterococcus	faecium	OR	Chicken Breast	SAMN07981992	S	R*	S	S	S	R	R	R	S	S	R	S	S	80.83	59855																		T450I			erm(B)	erm(B)				msr(C)	msr(C)
CVM N55317	GCA_002947295.1	PUAV00000000	Enterococcus	faecium	OR	Ground Beef	SAMN07981993	S	S	S	S	S	S	S	S	S	S	S	S	S	95.82	30639																										msr(C)	msr(C)
CVM N55337	GCA_002947485.1	PUAW00000000	Enterococcus	faecium	OR	Chicken Breast	SAMN07981994	S	R	S	S	S	S	S	S	S	R	R	S	S	83.61	27011							aadD	aadD																		msr(C)	msr(C)
CVM N55338	GCA_002947275.1	PUAX00000000	Enterococcus	faecalis	OR	Chicken Thighs	SAMN07981995	R	R	S	S	S	R	R	S	S	S	R	S	S	62.12	42961	aac(6')-aph(2'')	aac(6')-aph(2'')			aph(3')-III	aph(3')-III			aac(6’)-li			bacA									erm(B)	erm(B)			mph(D)
CVM N55655	GCA_002947255.1	PUAY00000000	Enterococcus	faecium	MD	Chicken Breast	SAMN07981996	S	S	S	S	S	R	R	S	S	R	R	S	S	70.57	24308										spc	spc					lnu(B)	lnu(B)		erm(A)	erm(A)	erm(B)	erm(B)
CVM N55706	GCA_002947205.1	PUAZ00000000	Enterococcus	faecalis	TN	Ground Turkey	SAMN07981997	R	R	S	S	S	R	R	S	S	S	R	S	S	60.25	40914	aac(6')-aph(2'')	aac(6')-aph(2'')			aph(3')-III				aac(6’)-li			bacA									erm(B)	erm(B)			mph(D)
CVM N55724	GCA_002947195.1	PUBA00000000	Enterococcus	faecalis	TN	Pork Chop	SAMN07981998	S	S	S	S	S	S	S	S	S	S	R	S	S	69.25	68428									aac(6’)-li			bacA													mph(D)
CVM N55725	GCA_002947175.1	PUBB00000000	Enterococcus	faecalis	TN	Pork Chop	SAMN07981999	S	S	S	S	S	S	S	S	S	S	R	S	S	73.78	60823									aac(6’)-li			bacA													mph(D)
CVM N55728	GCA_002947475.1	PUBC00000000	Enterococcus	faecium	TN	Chicken Wing	SAMN07982000	S	S	R	S	R	S	S	R	S	R	R	S	S	41.9	24306
CVM N55753	GCA_002947455.1	PUBD00000000	Enterococcus	faecalis	TN	Pork Chop	SAMN07982001	S	S	S	S	S	S	S	S	S	S	R	S	S	61.39	43152									aac(6’)-li			bacA													mph(D)
CVM N59409F	GCA_002946215.1	PTXJ00000000	Enterococcus	faecalis	TX	Beef Cows	SAMN07982002	S	S	S	S	S	S	S	S	S	S	R	S	S	85.51	64935									aac(6’)-li			bacA													mph(D)
CVM N59420F	GCA_002946155.1	PTXI00000000	Enterococcus	faecalis	AR	Young Chickens	SAMN07982003	R	R	S	S	S	R	R	S	S	S	R	S	S	72.97	87692	aac(6')-aph(2'')	aac(6')-aph(2'')							aac(6’)-li			bacA									erm(B)	erm(B)			mph(D)
CVM N59435F	GCA_002946175.1	PTXH00000000	Enterococcus	faecium	MO	Steers	SAMN07982004	S	S	S	S	S	S	S	S	S	S	R	S	S	80.92	40665																										msr(C)	msr(C)
CVM N59439F	GCA_002946115.1	PTXG00000000	Enterococcus	faecium	TX	Steers	SAMN07982005	S	S	S	S	S	S	S	S	S	S	R	S	S	91.45	68656																		T450I					mph(B)	mph(B)		msr(C)	msr(C)
CVM N59454F	GCA_002946095.1	PTXF00000000	Enterococcus	faecalis	IN	Market Swine	SAMN07982006	S	S	S	S	S	R	R	S	S	S	R	S	S	80.68	74281									aac(6’)-li			bacA									erm(B)	erm(B)			mph(D)
CVM N59455F	GCA_002946075.1	PTXE00000000	Enterococcus	faecalis	AL	Young Chickens	SAMN07982007	R	R	S	S	S	R	R	S	S	S	R	S	S	60.33	39073	aac(6')-aph(2'')	aac(6')-aph(2'')			aph(3')-III	aph(3')-III			aac(6’)-li			bacA									erm(B)	erm(B)			mph(D)
CVM N59457F	GCA_002945995.1	PTXD00000000	Enterococcus	faecalis	NJ	Beef Cows	SAMN07982008	S	S	S	S	S	S	S	S	S	S	S	S	S	75.24	51984									aac(6’)-li			bacA													mph(D)
CVM N59458F	GCA_002946015.1	PTXC00000000	Enterococcus	faecalis	NC	Young Turkeys	SAMN07982009	S	S	S	S	S	S	S	S	S	S	R	S	S	59.17	45380									aac(6’)-li			bacA				lnu(B)	lnu(B)								mph(D)
CVM N59462F	GCA_002945975.1	PTXB00000000	Enterococcus	faecalis	CA	Young Turkeys	SAMN07982010	S	S	S	S	S	R	R	R	S	S	R	S	S	87.65	64884									aac(6’)-li			bacA									erm(B)	erm(B)			mph(D)
CVM N59466F	GCA_002945915.1	PTXA00000000	Enterococcus	faecalis	CA	Market Swine	SAMN07982011	R	R	S	S	S	R	R	S	S	S	R	S	S	81.53	45740	aac(6')-aph(2'')	aac(6')-aph(2'')			aph(3')-III	aph(3')-III			aac(6’)-li			bacA				lnu(B)	lnu(B)				erm(B)	erm(B)			mph(D)
CVM N59469F	GCA_002945935.1	PTWZ00000000	Enterococcus	faecium	NC	Young Chickens	SAMN07982012	S	S	S	S	S	S	S	S	S	R*	S	S	S	77.25	43250																										msr(C)	msr(C)
CVM N59484F	GCA_002945895.1	PTWY00000000	Enterococcus	faecium	PA	Dairy Cows	SAMN07982013	S	S	S	S	S	S	S	S	S	S	S	S	S	86.18	36902													E192G													msr(C)	msr(C)
CVM N59491F	GCA_002945875.1	PTWX00000000	Enterococcus	faecalis	WI	Young Turkeys	SAMN07982014	S	S	S	S	S	S	S	S	S	S	R	S	S	68.17	64975									aac(6’)-li			bacA													mph(D)
CVM N59492F	GCA_002945835.1	PTWW00000000	Enterococcus	faecium	PA	Market Swine	SAMN07982015	S	S	S	S	S	S	S	S	S	S	R	S	S	74.96	35173																lnu(B)	lnu(B)									msr(C)	msr(C)
CVM N59503F	GCA_002945815.1	PTWV00000000	Enterococcus	faecium	NE	Beef Cows	SAMN07982016	S	S	S	S	S	S	S	S	S	S	R	S	S	103.65	54628																										msr(C)	msr(C)
CVM N59504F	GCA_002945795.1	PTWU00000000	Enterococcus	faecium	TX	Steers	SAMN07982017	S	S	S	S	S	R	R	S	S	S	R	S	S	101.25	51007																		T450I			erm(B)	erm(B)				msr(C)	msr(C)
CVM N59505F	GCA_002945775.1	PTWT00000000	Enterococcus	faecalis	MN	Young Turkeys	SAMN07982018	R	R	S	S	S	R	R	S	S	S	R	S	S	66.07	49683	aac(6')-aph(2'')	aac(6')-aph(2'')			aph(3')-III	aph(3')-III			aac(6’)-li			bacA									erm(B)	erm(B)
CVM N59508F	GCA_002945735.1	PTWS00000000	Enterococcus	faecalis	GA	Market Swine	SAMN07982019	S	S	S	S	S	S	S	S	S	S	S	S	S	90.02	90098									aac(6’)-li			bacA													mph(D)
CVM N59509F	GCA_002945715.1	PTWR00000000	Enterococcus	faecalis	VA	Sow	SAMN07982020	S*	R	S	S	S	R	R	S	R	S	R	S	S	43.16	54981	aac(6')-aph(2'')	aac(6')-aph(2'')			aph(3')-III	aph(3')-III			aac(6’)-li			bacA				lnu(B)	lnu(B)				erm(B)	erm(B)			mph(D)
CVM N59513F	GCA_002946315.1	PTWQ00000000	Enterococcus	faecium	NC	Market Swine	SAMN07982021	S	S	S	S	S	R	R	R	S	S	R	S	S	89.75	82264																					erm(B)	erm(B)				msr(C)	msr(C)
CVM N59517F	GCA_002946255.1	PTWP00000000	Enterococcus	faecium	TX	Sow	SAMN07982022	S	R	S	S	S	R	R	R	S	R*	R	S	S	131.03	11438					aph(3')-III	aph(3')-III										lnu(B)	lnu(B)				erm(B)	erm(B)				msr(C)	msr(C)
CVM N59531F	GCA_002945495.1	PTWO00000000	Enterococcus	faecium	MN	Beef Cows	SAMN07982023	S	S	S	S	S	S	S	S	S	S	S	S	S	65.38	76186																										msr(C)	msr(C)
CVM N59542F	GCA_002945475.1	PTWN00000000	Enterococcus	faecium	MO	Heifers	SAMN07982024	S	S	S	S	S	S	S	S	S	S	R	S	S	89.41	11484																lnu(B)	lnu(B)									msr(C)	msr(C)
CVM N59544F	GCA_002946275.1	PTWM00000000	Enterococcus	faecalis	GA	Young Chickens	SAMN07982025	R	R	S	S	S	R	R	S	S	S	S	S	S	80.32	47472	aac(6')-aph(2'')	aac(6')-aph(2'')							aac(6’)-li			bacA									erm(B)	erm(B)			mph(D)
CVM N59550F	GCA_002945625.1	PTWK00000000	Enterococcus	faecalis	IA	Sow	SAMN07982027	S*	R	S	S	S	R	R	S	R	S	R	S	S	59.95	50188	aac(6')-aph(2'')	aac(6')-aph(2'')			aph(3')-III	aph(3')-III			aac(6’)-li			bacA				lnu(B)	lnu(B)				erm(B)	erm(B)			mph(D)
CVM N59554F	GCA_002945655.1	PTWJ00000000	Enterococcus	faecalis	KS	Dairy Cows	SAMN07982028	S	S	S	S	S	S	S	S	S	S	S	S	S	97.79	65047									aac(6’)-li			bacA													mph(D)
CVM N59555F	GCA_002945555.1	PTWI00000000	Enterococcus	faecalis	NY	Dairy Cows	SAMN07982029	S	S	S	S	S	S	S	S	S	S	R	S	S	72.66	49961									aac(6’)-li			bacA
CVM N59559F	GCA_002945575.1	PTWH00000000	Enterococcus	faecium	KS	Heifers	SAMN07982030	S	S	S	S	S	S	R*	S	S	S	S*	S	S	88.58	74857																										msr(C)	msr(C)
CVM N59567F	GCA_002945615.1	PTWG00000000	Enterococcus	faecium	NY	Sow	SAMN07982031	S	S	S	S	S	S	S	S	S	S	S	S	S	93.19	43012																										msr(C)	msr(C)
CVM N59584F	GCA_002945595.1	PTWF00000000	Enterococcus	faecalis	WI	Dairy Cows	SAMN07982032	S	S	S	S	S	S	S	S	S	S	R	S	S	66.95	57439									aac(6’)-li			bacA													mph(D)
CVM N59589F	GCA_002946055.1	PTWE00000000	Enterococcus	faecium	MI	Beef Cows	SAMN07982033	S	S	S	S	S	S	S	S	S	S	R	S	S	66.16	91317																										msr(C)	msr(C)
CVM N59591F	GCA_002945535.1	PTWD00000000	Enterococcus	faecalis	VA	Young Chickens	SAMN07982034	S	S	S	S	S	S	S	S	S	S	R	S	S	58.9	44895									aac(6’)-li			bacA													mph(D)
CVM N59592F	GCA_002943875.1	PTWC00000000	Enterococcus	faecalis	CA	Young Turkeys	SAMN07982035	R	R	S	S	S	S*	R	S	S	S	R	S	S	42.92	32112	aac(6')-aph(2'')	aac(6')-aph(2'')							aac(6’)-li			bacA									erm(B)	erm(B)			mph(D)
CVM N59599F	GCA_002943935.1	PTWB00000000	Enterococcus	faecalis	KS	Beef Cows	SAMN07982036	S	S	S	S	S	S	S	S	S	S	S	S	S	52.85	58036									aac(6’)-li			bacA													mph(D)
CVM N59600F	GCA_002943885.1	PTWA00000000	Enterococcus	faecalis	MS	Young Chickens	SAMN07982037	R	R	S	S	S	R	R	S	S	S	R	S	S	26.79	37703	aac(6')-aph(2'')				aph(3')-III	aph(3')-III			aac(6’)-li			bacA									erm(B)	erm(B)			mph(D)
CVM N59606F	GCA_002946235.1	PTXK00000000	Enterococcus	faecalis	NC	Market Swine	SAMN07982038	S	R	S	S	S	R	R	S	R	S	R	S	S	49.23	45748					aph(3')-III	aph(3')-III			aac(6’)-li			bacA									erm(B)	erm(B)			mph(D)
CVM N59609F	GCA_002944555.1	PTUK00000000	Enterococcus	faecalis	OR	Market Swine	SAMN07982039	S*	S*	S	S	S	S*	S*	S	S*	S	S*	S	S	66.98	53345	aac(6')-aph(2'')	aac(6')-aph(2'')			aph(3')-III	aph(3')-III			aac(6’)-li			bacA				lnu(B)	lnu(B)				erm(B)	erm(B)			mph(D)
CVM N59611F	GCA_002944635.1	PTUL00000000	Enterococcus	faecalis	OK	Market Swine	SAMN07982040	R*	R*	S	S	S	R*	R*	S	S	S	S*	S	S	81.59	58055									aac(6’)-li			bacA		lnu(A)	lnu(A)										mph(D)
CVM N59613F	GCA_002944735.1	PTVX00000000	Enterococcus	faecium	KS	Sow	SAMN07982041	S	R	S	S	S	R	R	S	S	S	R	S	S	83.69	84407					aph(3')-III	aph(3')-III															erm(B)	erm(B)				msr(C)	msr(C)
CVM N59624F	GCA_002944675.1	PTVY00000000	Enterococcus	faecium	KS	Heifers	SAMN07982042	S	S	S	S	S	S	S	S	S	S	R	S	S	78.2	100653																										msr(C)	msr(C)
CVM N59646F	GCA_002944805.1	PTVZ00000000	Enterococcus	faecalis	VA	Young Turkeys	SAMN07982043	R	R	S	S	S	R	R	S	S	S	R	S	S	48.31	33651	aac(6')-aph(2'')	aac(6')-aph(2'')			aph(3')-III	aph(3')-III			aac(6’)-li			bacA									erm(B)	erm(B)			mph(D)
CVM N59653F	GCA_002944125.1	PTTQ00000000	Enterococcus	faecium	IA	Sow	SAMN07982044	S	S	S	S	S	S	S	S	S	S	R	S	S	83.68	69159																lnu(B)	lnu(B)									msr(C)	msr(C)
CVM N59689F	GCA_002944575.1	PTUJ00000000	Enterococcus	faecalis	IA	Market Swine	SAMN07982045	S	S	S	S	R	S	S	S	S	S	R	S	S	25.34	38974									aac(6’)-li			bacA													mph(D)
CVM N59711F	GCA_002944955.1	PTUU00000000	Enterococcus	faecium	GA	Market Swine	SAMN07982046	S	S	S	S	S	S	S	R	S	S	R	S	S	84.78	66587																lnu(B)	lnu(B)									msr(C)	msr(C)
CVM N59745F	GCA_002944915.1	PTUT00000000	Enterococcus	faecium	NE	Steers	SAMN07982047	S	S	S	S	S	S	S	S	S	S	S	S	S	31.92	75528																										msr(C)	msr(C)
CVM N59754F	GCA_002944835.1	PTUQ00000000	Enterococcus	faecium	AR	Young Chickens	SAMN07982048	S	S	S	S	S	R	R	R	S	S	R	S	S	41.74	40079																lnu(B)	lnu(B)				erm(B)	erm(B)				msr(C)	msr(C)
CVM N59779F	GCA_002944795.1	PTUP00000000	Enterococcus	faecium	WI	Sow	SAMN07982049	S	S	S	S	S	S	S	S	S	S	R	S	S	59.38	45289																lnu(B)	lnu(B)	T450I								msr(C)	msr(C)
CVM N59788F	GCA_002944705.1	PTUO00000000	Enterococcus	faecium	ID	Sow	SAMN07982050	S	S	S	S	S	S	S	S	S	S	R	S	S	104.51	54766																										msr(C)	msr(C)
CVM N59836F	GCA_002944875.1	PTUR00000000	Enterococcus	faecalis	PA	Young Turkeys	SAMN07982052	S	S	S	S	S	R	R	S	R	S	R	S	S	42.35	63990									aac(6’)-li			bacA									erm(B)	erm(B)			mph(D)
CVM N59841F	GCA_002944755.1	PTUN00000000	Enterococcus	faecalis	VA	Young Turkeys	SAMN07982053	R	R	S	S	S	S	S	S	S	S	R	S	S	53.22	43893	aac(6')-aph(2'')	aac(6')-aph(2'')							aac(6’)-li
CVM N59845F	GCA_002944655.1	PTUM00000000	Enterococcus	faecalis	OH	Dairy Cows	SAMN07982054	S	S	S	S	S	S	S	S	S	S	S	S	S	27.11	31991									aac(6’)-li			bacA													mph(D)
CVM N59847F	GCA_002945315.1	PTVQ00000000	Enterococcus	faecalis	MO	Young Chickens	SAMN07982055	R	R	S	S	S	R	R	S	S	S	S	S	S	26.31	29113	aac(6')-aph(2'')	aac(6')-aph(2'')							aac(6’)-li			bacA									erm(B)	erm(B)			mph(D)
CVM N59860F	GCA_002945295.1	PTVP00000000	Enterococcus	faecalis	GA	Young Chickens	SAMN07982056	S	R	S	S	S	R	R	S	R	S	R	S	S	29.28	41169					aph(3')-III	aph(3')-III			aac(6’)-li			bacA									erm(B)	erm(B)			mph(D)
CVM N59862F	GCA_002945275.1	PTVO00000000	Enterococcus	faecalis	TX	Market Swine	SAMN07982057	R	R	S	S	S	R	R	S	S	S	R	S	S	84.21	74823	aac(6')-aph(2'')	aac(6')-aph(2'')			aph(3')-III	aph(3')-III			aac(6’)-li			bacA				lnu(B)	lnu(B)				erm(B)	erm(B)			mph(D)
CVM N59891F	GCA_002945255.1	PTVN00000000	Enterococcus	faecium	SD	Young Turkeys	SAMN07982058	S	R	S	S	S	R	R	R	S	S	R	S	S	40.02	44776					aph(3')-III	aph(3')-III										lnu(B)	lnu(B)	T450I			erm(B)	erm(B)				msr(C)	msr(C)
CVM N59896F	GCA_002945065.1	PTVI00000000	Enterococcus	faecalis	WI	Young Turkeys	SAMN07982059	R	R	S	S	S	R	R	S	S	S	R	S	S	45.83	30251	aac(6')-aph(2'')	aac(6')-aph(2'')			aph(3')-III	aph(3')-III			aac(6’)-li			bacA									erm(B)	erm(B)			mph(D)
CVM N59907F	GCA_002945055.1	PTVH00000000	Enterococcus	faecium	AR	Young Chickens	SAMN07982060	S	S	S	S	S	S	S	S	S	R	R	S	S	23.06	23639																lnu(B)	lnu(B)									msr(C)	msr(C)
CVM N59910F	GCA_002944985.1	PTVF00000000	Enterococcus	faecalis	TN	Sow	SAMN07982061	S*	R	S	S	S	R	R	S	R	S	R	S	S	52.79	53942	aac(6')-aph(2'')	aac(6')-aph(2'')			aph(3')-III	aph(3')-III			aac(6’)-li			bacA				lnu(B)	lnu(B)				erm(B)	erm(B)			mph(D)
CVM N59936F	GCA_002945015.1	PTVE00000000	Enterococcus	faecalis	VA	Young Turkeys	SAMN07982062	R	R	S	S	S	R	R	S	S	S	R	S	S	57.72	41922	aac(6')-aph(2'')	aac(6')-aph(2'')			aph(3')-III				aac(6’)-li			bacA									erm(B)	erm(B)			mph(D)
CVM N59943F	GCA_002945095.1	PTVG00000000	Enterococcus	faecium	KS	Steers	SAMN07982063	S	S	S	S	S	R	R	S	S	S	R	S	S	49.79	59765																					erm(B)	erm(B)				msr(C)	msr(C)
CVM N59947F	GCA_002944975.1	PTVD00000000	Enterococcus	faecium	TX	Market Swine	SAMN07982064	S	S	S	S	S	R	R	S	S	S	R	S	S	133.41	82330																lnu(B)	lnu(B)				erm(B)	erm(B)				msr(C)	msr(C)
CVM N59951F	GCA_002944435.1	PTVC00000000	Enterococcus	faecium	OK	Young Chickens	SAMN07982065	S	S	S	S	S	S	S	S	S	S	S	S	S	93.76	37301																										msr(C)	msr(C)
CVM N59959F	GCA_002944275.1	PTVB00000000	Enterococcus	faecalis	AR	Young Chickens	SAMN07982066	S	S	S	S	S	R	R	S	S	S	S	S	S	52.59	49497									aac(6’)-li			bacA									erm(B)	erm(B)			mph(D)
CVM N59963F	GCA_002944255.1	PTVA00000000	Enterococcus	faecalis	CA	Heifers	SAMN07982067	S	S	S	S	S	S	S	S	S	S	S	S	S	119.41	73656									aac(6’)-li			bacA													mph(D)
CVM N59998F	GCA_002944535.1	PTUZ00000000	Enterococcus	faecium	OR	Market Swine	SAMN07982068	S	S	S	S	S	S	S	R	S	S	R	S	S	28.61	35192																lnu(B)	lnu(B)	T450I								msr(C)	msr(C)
CVM N60001F	GCA_002944615.1	PTUW00000000	Enterococcus	faecium	OK	Market Swine	SAMN07982069	S	S	S	S	S	S	S	S	S	S	R	S	S	106	79964																										msr(C)	msr(C)
CVM N60027F	GCA_002943975.1	PTUY00000000	Enterococcus	faecalis	PA	Sow	SAMN07982070	S	S	S	S	S	R	R	S	S	S	R	S	S	97.48	57895									aac(6’)-li			bacA	E192G								erm(B)	erm(B)			mph(D)
CVM N60034F	GCA_002943945.1	PTUX00000000	Enterococcus	faecalis	UT	Dairy Cows	SAMN07982071	S	S	S	S	S	S	S	S	S	S	R	S	S	81.68	65704									aac(6’)-li			bacA													mph(D)
CVM N60045F	GCA_002944515.1	PTUI00000000	Enterococcus	faecium	AR	Young Chickens	SAMN07982072	S	S	S	S	S	S	S	S	S	S*	R	S	S	84.11	51810																lnu(B)	lnu(B)									msr(C)	msr(C)
CVM N60048F	GCA_002944375.1	PTUV00000000	Enterococcus	faecium	TX	Young Chickens	SAMN07982073	S	S	S	S	R	S	S	S	S	S	S	S	S	44.04	37177																										msr(C)	msr(C)
CVM N60061F	GCA_002944455.1	PTUH00000000	Enterococcus	faecium	WV	Young Chickens	SAMN07982074	S	S	S	S	S	S	S	S	S	S*	R	S	S	37	31806																										msr(C)	msr(C)
CVM N60063F	GCA_002944475.1	PTUG00000000	Enterococcus	faecalis	IA	Market Swine	SAMN07982075	R	R	S	S	S	R	R	S	R	S	R	S	S	86.06	83264	aac(6')-aph(2'')	aac(6')-aph(2'')			aph(3')-III	aph(3')-III			aac(6’)-li			bacA				lnu(B)	lnu(B)				erm(B)	erm(B)			mph(D)
CVM N60100F	GCA_002944395.1	PTUF00000000	Enterococcus	faecalis	FL	Heifers	SAMN07982076	S	S	S	S	S	S	S	S	S	S	S	S	S	61.4	46495									aac(6’)-li			bacA
CVM N60114F	GCA_002944295.1	PTUE00000000	Enterococcus	faecalis	OH	Sow	SAMN07982077	R	R	S	S	S	R	R	S	R	S	R	S	S	97.18	74005	aac(6')-aph(2'')	aac(6')-aph(2'')			aph(3')-III	aph(3')-III			aac(6’)-li			bacA				lnu(B)	lnu(B)				erm(B)	erm(B)			mph(D)
CVM N60123F	GCA_002944355.1	PTUD00000000	Enterococcus	faecium	TN	Sow	SAMN07982078	S	S	S	S	S	S	S	R	S	S	S	S	S	32.56	30031																										msr(C)	msr(C)
CVM N60190F	GCA_002944305.1	PTUC00000000	Enterococcus	faecium	MS	Young Chickens	SAMN07982079	S	S	S	S	S	S	S	S	S	S	S	S	S	26.45	54106																										msr(C)	msr(C)
CVM N60200F	GCA_002944235.1	PTUB00000000	Enterococcus	faecium	PA	Young Turkeys	SAMN07982080	S	S	R	S	S	S	S	S	S	S	S	S	S	93.43	30657																										msr(C)	msr(C)
CVM N60252F	GCA_002944215.1	PTUA00000000	Enterococcus	faecium	GA	Young Chickens	SAMN07982081	S	S	S	S	S	S	S	S	S	S	S	S	S	94.3	43322																		T450I								msr(C)	msr(C)
CVM N60260F	GCA_002944025.1	PTTY00000000	Enterococcus	faecium	TX	Heifers	SAMN07982082	S	S	S	S	S	R*	S	S	S	S	R	S	S	113.38	42742																										msr(C)	msr(C)
CVM N60268F	GCA_002944055.1	PTTZ00000000	Enterococcus	faecalis	PA	Sow	SAMN07982083	S	R	S	S	S	R	R	S	R	S	R	S	S	86.34	62415					aph(3')-III	aph(3')-III			aac(6’)-li			bacA				lnu(B)	lnu(B)				erm(B)	erm(B)			mph(D)
CVM N60271F	GCA_002944015.1	PTTX00000000	Enterococcus	faecalis	MS	Young Chickens	SAMN07982084	S	S	S	S	S	R	R	S	S	S	R	S	S	29.34	33289									aac(6’)-li			bacA									erm(B)	erm(B)			mph(D)
CVM N60280F	GCA_002944065.1	PTTW00000000	Enterococcus	faecalis	NH	Market Swine	SAMN07982085	S	S	S	S	S	S	S	S	S	S	R	S	S	29.89	33371									aac(6’)-li			bacA													mph(D)
CVM N60284F	GCA_002944175.1	PTTT00000000	Enterococcus	faecium	IA	Sow	SAMN07982086	S	S	S	S	S	S	S	R	S	S	R	S	S	24.56	19355																lnu(B)	lnu(B)
CVM N60299F	GCA_002944195.1	PTTV00000000	Enterococcus	faecium	GA	Young Chickens	SAMN07982087	S	S	S	S	S	S	S	R	S	R*	S*	S	S	46.87	18270																lnu(B)	lnu(B)
CVM N60324F	GCA_002944135.1	PTTU00000000	Enterococcus	faecium	PA	Market Swine	SAMN07982088	S	R*	R	S	R	S	S	R	S	R*	R	S	S	47.07	18035																lnu(B)	lnu(B)
CVM N60336F	GCA_002944075.1	PTTR00000000	Enterococcus	faecium	AR	Young Chickens	SAMN07982089	S	S	S	S	S	S	S	R	S	R	R	S	S	111.09	43402													E192G			lnu(B)	lnu(B)	T450I								msr(C)	msr(C)
CVM N60357F	GCA_002944115.1	PTTS00000000	Enterococcus	faecium	MS	Young Chickens	SAMN07982090	S	S	S	S	S	R*	S	S	S	S*	S*	S	S	42.53	18737													E192G			lnu(B)	lnu(B)									msr(C)	msr(C)
CVM N60363F	GCA_002944695.1	PTVW00000000	Enterococcus	faecium	IN	Market Swine	SAMN07982091	S	S	S	S	S	S	S	R	S	S	R	S	S	168.95	43005																lnu(B)	lnu(B)	T450I								msr(C)	msr(C)
CVM N60365F	GCA_002945455.1	PTVV00000000	Enterococcus	faecium	MO	Beef Cows	SAMN07982092	S	S	S	S	S	S	S	R	S	S	S	S	S	150.97	67614													E192G													msr(C)	msr(C)
CVM N60392F	GCA_002945435.1	PTVU00000000	Enterococcus	faecalis	AL	Sow	SAMN07982093	R	R	S	S	S	R	R	S	R	S	R	S	S	88.34	77274	aac(6')-aph(2'')	aac(6')-aph(2'')			aph(3')-III	aph(3')-III			aac(6’)-li			bacA				lnu(B)	lnu(B)				erm(B)	erm(B)			mph(D)
CVM N60417F	GCA_002945395.1	PTVT00000000	Enterococcus	faecium	MI	Market Swine	SAMN07982094	S	S	S	S	S	S	S	S	S	S	S	S	S	115.36	57746																										msr(C)	msr(C)
CVM N60425F	GCA_002945375.1	PTVS00000000	Enterococcus	faecium	GA	Young Chickens	SAMN07982095	S	S	S	S	S	S	S	S	S	S	S	S	S	139.25	42211																										msr(C)	msr(C)
CVM N60440F	GCA_002945355.1	PTVR00000000	Enterococcus	faecalis	FL	Dairy Cows	SAMN07982096	R	R	S	R	S	R	R	S	S	S	R	S	S	86.22	47532	aac(6')-aph(2'')	aac(6')-aph(2'')			aph(3')-III	aph(3')-III			aac(6’)-li			bacA				lnu(B)	lnu(B)				erm(B)	erm(B)			mph(D)
CVM N60449F	GCA_002945215.1	PTVM00000000	Enterococcus	faecium	GA	Young Chickens	SAMN07982097	S	S	S	S	S	S	S	S	S	S	S	S	S	133.75	45202																		T450I								msr(C)	msr(C)
CVM N60463F	GCA_002945185.1	PTVL00000000	Enterococcus	faecium	CA	Young Turkeys	SAMN07982098	R	R	S	S	S	S*	R	R	S	R*	R	S	S	81.13	29432			aph(2'')-Id	aph(2'')-Id	aph(3')-III	aph(3')-III				spc	spc					lnu(B)	lnu(B)		erm(A)	erm(A)	erm(B)	erm(B)				msr(C)	msr(C)
CVM N60490F	GCA_002945175.1	PTVK00000000	Enterococcus	faecium	WI	Dairy Cows	SAMN07982099	S	S	S	S	S	S	S	R	S	S	S	S	S	145.2	46418																										msr(C)	msr(C)
CVM N60519F	GCA_002945145.1	PTVJ00000000	Enterococcus	faecium	AZ	Beef Cows	SAMN07982100	S	S	S	S	S	S	S	S	S	S	R	S	S	102.38	79986																		T450I								msr(C)	msr(C)
Total count																							45	42	8	8	55	51	1	1		3	3	93	5	2	2	53	53	13	3	3	82	81	1	1	84	85	85
Legend:
AMR
Assayed drug
Drug class
Phenotypes
Resistant phenotype
Non-correlation between genotype and phenotype
In-silico detected ARGs
ARGs / SNPs found in original study
ARGs / SNPs found in this study
[truncated: 57 more columns]
